# Supplementary material for: Displacement of Gray Matter and Incidence of Seizures in Patients with Cerebral Cavernous Malformations
Source: MDPI journal article supplement (doi:10.3390/biomedicines9121872), 2021-12-10
Supplement: s1 [file s1]

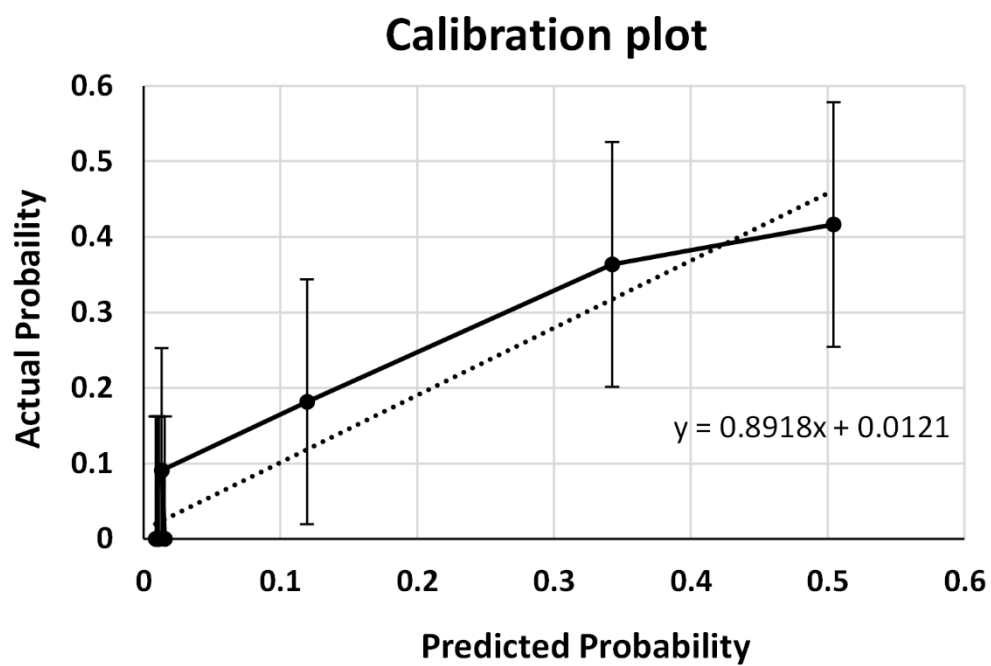

**Figure S1.** Calibration slope of calibration plot.




LOAD

## Intelligent Cerebral Cavernous Malformations (iCCM)

ID 
Name 
Gender 
DOB 
GK Date

Diagnosis:

RUN
☒ Seizure
☒ Hemorrhage

**T1**  


**T1 with CCM label**  


**GM template (Unified)**  


**GM template (DARTEL)**  


Slide

Slide

EXPORT

GM\_Unified  %    GM\_Unified  ml

GM\_DARTEL  %    GM\_DARTEL  ml

Component of iCCM

SNAPSHOT

Cerebellum  %    Frontal lobe  %

Limbic lobe  %    Brain stem  %

Occipital lobe  %    Parietal lobe  %

Temporal lobe  %

Sublobar  %

Unfinish  
Running  
Finish

Copyright 2021, Prof. Syu-Jyun Peng from Taipei Medical University, sjpeng2019@tmu.edu.tw.

**Figure S2.** Overview of intelligent cerebral cavernous malformations (iCCM) tool, including LOAD, RUN, EXPORT, and SNAPSHOT functions. LOAD initiates the input of T1WI DICOM data, RUN initiates computer assisted analysis in quantifying the displaced volume and proportion in GM and CCM regions, EXPORT outputs the analysis and results, and SNAPSHOT captures an image of the processed T1WI and iCCM GUI results page.

**Table S1.** Performance of the discrimination between seizure and nonseizure groups.

| Indices     | Value | 95% CI      |
|-------------|-------|-------------|
| AUC         | 0.901 | 0.823–0.978 |
| Sensitivity | 0.917 | 0.905–0.929 |
| Specificity | 0.838 | 0.816–0.860 |
| PPV         | 0.407 | 0.368–0.446 |
| NPV         | 0.988 | 0.986–0.990 |
| F1-score    | 0.564 | 0.524–0.604 |
| DOR         | 0.570 | 0.530–0.610 |
| MCC         | 0.546 | 0.506–0.586 |
| Kappa       | 0.487 | 0.446–0.528 |

AUC: Area Under the Curve; PPV: Positive Predictive Value; NPV: Negative Predictive Value; DOR: diagnostic odds ratio; MCC: Matthew's Correlation Coefficient; Kappa: Kappa coefficient, Confidence intervals (CI).

**Table S2.** Distribution of CCM as a function of location in the standard brain space.

| Structure      | Seizure (n=12) (%) | Nonseizure (n=99) (%) | <i>p</i> |
|----------------|--------------------|-----------------------|----------|
| Frontal lobe   | 30.427 ± 36.919    | 10.962 ± 27.475       | 0.001*   |
| Temporal lobe  | 15.362 ± 29.146    | 2.392 ± 12.867        | 0.002*   |
| Parietal lobe  | 14.870 ± 32.267    | 2.106 ± 9.863         | 0.048*   |
| Occipital lobe | 3.648 ± 12.146     | 0.419 ± 3.997         | 0.011*   |
| Sublobar       | 16.673 ± 28.581    | 15.822 ± 31.238       | 0.341    |
| Limbic lobe    | 17.595 ± 20.751    | 2.804 ± 11.258        | <0.001*  |
| Cerebellum     | 0.210 ± 0.728      | 11.872 ± 24.337       | 0.062    |
| Brainstem      | 0.000 ± 0.000      | 47.687 ± 41.392       | <0.001*  |

\* *p* value < 0.05 indicating statistical significance via Wilcoxon rank sum test.
